# Supplementary material for: Altered Lnc-EGFR, SNHG1, and LincRNA-Cox2 Profiles in Patients with Relapsing-Remitting Multiple Sclerosis: Impact on Disease Activity and Progression
Source: MDPI journal article supplement (doi:10.3390/diagnostics13081448), 2023-04-17
Supplement: s1 [file s1]

---

**Supplementary Table 1: Primer sequences used for real-time PCR.**

| <b>Gene</b>         | <b>Sequence</b>                                                                              |
|---------------------|----------------------------------------------------------------------------------------------|
| <b>Lnc-EGFR</b>     | <b>Forward</b> 5'- AACACCCTGGTCTGGAAGTACG-3'<br><b>Reverse</b> 5'- TCGTTGGACAGCCTTCAAGACC-3' |
| <b>FOXP3</b>        | <b>Forward</b> 5'- GGCACAATGTCTCCTCCAGAGA-3'<br><b>Reverse</b> 5'- CAGATGAAGCCTTGGTCAGTGC-3' |
| <b>SNHG1</b>        | <b>Forward</b> 5'- AGGCTGAAGTTACAGGTC-3'<br><b>Reverse</b> 5'- TTGGCTCCCAGTGTCTTA-3'         |
| <b>lincRNA-Cox2</b> | <b>Forward</b> 5'- CGGTGAAACTCTGGCTAGACAG-3'<br><b>Reverse</b> 5'- GCAAACCGTAGATGCTCAGGGA-3' |
| <b>NLRP3</b>        | <b>Forward</b> 5'- GGACTGAAGCACCTGTTGTGCA-3'<br><b>Reverse</b> 5'- TCCTGAGTCTCCCAAGGCATTC-3' |
| <b>ASC</b>          | <b>Forward</b> 5'- ATCCAGGCCCTCCTCAGT-3'<br><b>Reverse</b> 5'- GTTTGTGACCCTCGCGATAAG-3'      |
| <b>Caspase-1</b>    | <b>Forward</b> 5'- GCTGAGGTTGACATCACAGGCA-3'<br><b>Reverse</b> 5'- TGCTGTCAGAGGTCTTGTGCTC-3' |
| <b>GAPDH</b>        | <b>Forward</b> 5'-GTCTCCTCTGACTTCAACAGCG-3'<br><b>Reverse</b> 5'-ACCACCCTGTTGCTGTAGCCAA-3'   |
